# Supplementary material for: Identification of an inhibitory pocket in falcilysin bound by chloroquine provides a new avenue for malaria drug development
Source: Research Square preprint supplement (doi:10.21203/rs.3.rs-1301179/v1), 2022-02-09
Supplement: Supplementary file 1 [file 466e4ed5783262a6e4d1cedd.xlsx]

## Sheet: Upreg_Found in single drug
CQ 3D7 (n=87)			MK 3D7 (n=349)			MK Dd2 (n=50)			MFQ 3D7 (n=34)
Gene Id	Product		Gene Id	Product		PF3D7_0722600	U3 small nucleolar RNA-associated protein 7 putative		PF3D7_1100400	rifin
PF3D7_0107500	NPC1-related protein putative		PF3D7_1373000	rifin		PF3D7_1143900	ATP-dependent (S)-NAD(P)H-hydrate dehydratase putative		PF3D7_0517500	UTP--glucose-1-phosphate uridylyltransferase putative
PF3D7_0611200	AP2 domain transcription factor putative		PF3D7_1327300	conserved Plasmodium protein unknown function		PF3D7_0708800	heat shock protein 110		PF3D7_1314400	conserved protein unknown function
PF3D7_0109400	tubulin-specific chaperone a putative		PF3D7_0324800	rifin		PF3D7_1213700	DNA-directed RNA polymerases I II and III subunit RPABC3 putative		PF3D7_0931300	conserved Plasmodium protein unknown function
PF3D7_1347400	conserved Plasmodium protein unknown function		PF3D7_1431500	mitogen-activated protein kinase 1		PF3D7_0710700	conserved Plasmodium protein unknown function		PF3D7_1241100	polyadenylation factor subunit 2 putative
PF3D7_0524700	mitochondrial import receptor subunit TOM22 putative		PF3D7_1002000	Plasmodium exported protein (hyp2) unknown function		PF3D7_1020500	ribosomal silencing factor RsfS putative		PF3D7_1222600	AP2 domain transcription factor AP2-G
PF3D7_1213600	dynein light chain 1 putative		PF3D7_0321000	conserved protein unknown function		PF3D7_0512200	glutathione synthetase		PF3D7_1239300	conserved Plasmodium protein unknown function
PF3D7_1454900	conserved protein unknown function		PF3D7_0731100	EMP1-trafficking protein		PF3D7_0516000	RAP protein putative		PF3D7_1206800	conserved Plasmodium protein unknown function
PF3D7_0918900	gamma-glutamylcysteine synthetase		PF3D7_1141100	conserved Plasmodium protein unknown function		PF3D7_1138700	conserved Plasmodium protein unknown function		PF3D7_0526600	conserved Plasmodium protein unknown function
PF3D7_1327700	regulator of nonsense transcripts 3B putative		PF3D7_0620900	tRNA Leucine		PF3D7_0703900	conserved Plasmodium membrane protein unknown function		PF3D7_0401300	rifin
PF3D7_0315100	eukaryotic translation initiation factor 4E		PF3D7_1121700	protein GCN20		PF3D7_0114900	Plasmodium exported protein unknown function pseudogene		PF3D7_1100200	erythrocyte membrane protein 1 PfEMP1
PF3D7_1402000	conserved Plasmodium protein unknown function		PF3D7_0906500	arginase		PF3D7_1237200	conserved Plasmodium protein unknown function		PF3D7_0812900	conserved Plasmodium protein unknown function
PF3D7_1406000	RNA-binding protein 8A putative		PF3D7_1136900	subtilisin-like protease 2		PF3D7_1423700	conserved Plasmodium protein unknown function		PF3D7_1312600	2-oxoisovalerate dehydrogenase subunit alpha mitochondrial putative
PF3D7_1448800	Appr-1-p processing domain protein		PF3D7_0508700	pre-mRNA-processing ATP-dependent RNA helicase PRP5 putative		PF3D7_0911400	conserved Plasmodium protein unknown function		PF3D7_0408800	conserved Plasmodium protein unknown function
PF3D7_1340600	RNA lariat debranching enzyme putative		PF3D7_0407000	conserved Plasmodium protein unknown function		PF3D7_0610200	RNA-binding protein 25 putative		PF3D7_1253000	gametocyte erythrocyte cytosolic protein
PF3D7_1322900	conserved protein unknown function		PF3D7_1428500	protein kinase putative		PF3D7_1238400	conserved protein unknown function		PF3D7_0714100	MAATS1 domain-containing protein putative
PF3D7_0204500	aspartate transaminase		PF3D7_1020800	dihydrolipoamide acyltransferase component E2		PF3D7_1219000	formin 2		PF3D7_0808600	erythrocyte membrane protein 1 PfEMP1
PF3D7_1464900	ATP-dependent zinc metalloprotease FTSH putative		PF3D7_0911100	conserved protein unknown function		PF3D7_0815100	heptatricopeptide repeat and RAP domain-containing protein putative		PF3D7_0918800	dihydrouridine synthase putative
PF3D7_0923700	conserved protein unknown function		PF3D7_1225700	VAC14 domain-containing protein putative		PF3D7_1478600	EMP1-trafficking protein		PF3D7_1469600	acetyl-CoA carboxylase
PF3D7_1346300	DNA/RNA-binding protein Alba 2		PF3D7_0320500	nicotinamidase putative		PF3D7_1031300	conserved Plasmodium protein unknown function		PF3D7_1123400	translation elongation factor EF-1 subunit alpha putative
PF3D7_1410500	conserved Plasmodium protein unknown function		PF3D7_0602100	ATP-dependent RNA helicase putative		PF3D7_1134200	conserved Plasmodium protein unknown function		PF3D7_0900600	rifin
PF3D7_1443300	U6 snRNA-associated Sm-like protein LSm5 putative		PF3D7_1146200	conserved Plasmodium protein unknown function		PF3D7_1022300	ZIP domain-containing protein putative		PF3D7_1205900	conserved protein unknown function
PF3D7_0610700	conserved Plasmodium protein unknown function		PF3D7_1017500	myosin essential light chain ELC		PF3D7_0711500	regulator of chromosome condensation putative		PF3D7_1216000	serine--tRNA ligase putative
PF3D7_0810700	conserved Plasmodium protein unknown function		PF3D7_0800900	Plasmodium exported protein (hyp7) unknown function pseudogene		PF3D7_0914200	phospholipid or glycerol acyltransferase putative		PF3D7_1101100	rifin
PF3D7_0823100	RWD domain-containing protein putative		PF3D7_1372500	stevor pseudogene		PF3D7_1346000	dynactin subunit 2 putative		PF3D7_1209100	conserved Plasmodium protein unknown function
PF3D7_1344800	aspartate carbamoyltransferase		PF3D7_1038500	Plasmodium exported protein unknown function		PF3D7_0500800	mature parasite-infected erythrocyte surface antigen		PF3D7_1421800	conserved Plasmodium protein unknown function
PF3D7_1342700	DNA-directed RNA polymerases I II and III subunit RPABC4 putative		PF3D7_0114400	erythrocyte membrane protein 1 (PfEMP1) exon 2 pseudogene		PF3D7_1147000	sporozoite and liver stage asparagine-rich protein		PF3D7_1246100	delta-aminolevulinic acid synthetase
PF3D7_0711300	conserved Plasmodium protein unknown function		PF3D7_1129400	rRNA (cytosine-C(5))-methyltransferase putative		PF3D7_1149500	ring-infected erythrocyte surface antigen 2 pseudogene		PF3D7_0404500	6-cysteine protein
PF3D7_0513400	GTP-binding protein putative		PF3D7_1354300	large subunit rRNA methyltransferase putative		PF3D7_1477000	Plasmodium exported protein (hyp17) unknown function pseudogene		PF3D7_1345800	conserved Plasmodium protein unknown function
PF3D7_0110000	conserved Plasmodium protein unknown function		PF3D7_1200600	erythrocyte membrane protein 1 PfEMP1		PF3D7_0110500	bromodomain protein putative		PF3D7_1300400	rifin
PF3D7_0308600	pre-mRNA-processing factor 19 putative		PF3D7_1458000	cysteine proteinase falcipain 1		PF3D7_1337000	mitochondrial intermediate peptidase putative		PF3D7_0412700	erythrocyte membrane protein 1 PfEMP1
PF3D7_1407100	rRNA 2'-O-methyltransferase fibrillarin putative		PF3D7_1307100	U3 small nucleolar RNA-associated protein 6 putative		PF3D7_0801800	mannose-6-phosphate isomerase putative		PF3D7_0712900	erythrocyte membrane protein 1 PfEMP1
PF3D7_1121600	exported protein 1		PF3D7_0629300	phospholipase putative		PF3D7_1416900	prefoldin subunit 2 putative		PF3D7_1417000	inner membrane complex protein 1l putative
PF3D7_0532100	early transcribed membrane protein 5		PF3D7_0408300	zinc finger Ran-binding domain-containing protein 2 putative		PF3D7_0706700	DNA mismatch repair protein MSH2 putative		PF3D7_1219300	erythrocyte membrane protein 1 PfEMP1
PF3D7_1247200	conserved protein unknown function		PF3D7_0825900	conserved Plasmodium protein unknown function		PF3D7_1464300	conserved Plasmodium protein unknown function
PF3D7_0906910	tubulin-specific chaperone putative		PF3D7_0620600	conserved Plasmodium protein unknown function		PF3D7_1020700	N-acetyltransferase GNAT family putative
PF3D7_0318100	stomatin-like protein putative		PF3D7_1464000	YL1 nuclear protein putative		PF3D7_1118400	haloacid dehalogenase-like hydrolase putative
PF3D7_0502700	conserved protein unknown function		PF3D7_0726200	serine/threonine protein kinase FIKK family		PF3D7_1434600	methionine aminopeptidase 2
PF3D7_1346800	6-cysteine protein		PF3D7_0920800	inosine-5'-monophosphate dehydrogenase		PF3D7_1149000	antigen 332 DBL-like protein
PF3D7_0913400	conserved Plasmodium protein unknown function		PF3D7_1343200	tRNA guanosine-2'-O-methyltransferase putative		PF3D7_0817300	conserved Plasmodium protein unknown function
PF3D7_1465200	mediator of RNA polymerase II transcription subunit 4 putative		PF3D7_0702300	sporozoite threonine and asparagine-rich protein		PF3D7_1354900	conserved Plasmodium protein unknown function
PF3D7_1003200	ribosome-binding factor A putative		PF3D7_1470600	RAP protein putative		PF3D7_0730300	AP2 domain transcription factor AP2-L putative
PF3D7_0410600	conserved protein unknown function		PF3D7_1337100	protein kinase 6		PF3D7_0220300	Plasmodium exported protein unknown function
PF3D7_1360200	ER membrane protein complex subunit 3 putative		PF3D7_1225500	small subunit rRNA processing factor putative		PF3D7_1129700	conserved Plasmodium protein unknown function
PF3D7_1030700	RNA methyltransferase putative		PF3D7_1237600	periodic tryptophan protein 1 putative		PF3D7_1476400	serine/threonine protein kinase FIKK family pseudogene
PF3D7_0506000	conserved Plasmodium protein unknown function		PF3D7_0906700	leucine-rich repeat protein		PF3D7_0709600	ribonucleases P/MRP protein subunit POP1 putative
PF3D7_0923000	DNA-directed RNA polymerase II subunit RPB3 putative		PF3D7_0935700	Plasmodium exported protein unknown function		PF3D7_0105600	conserved Plasmodium protein unknown function
PF3D7_1340900	sodium-dependent phosphate transporter		PF3D7_1336900	tryptophan--tRNA ligase		PF3D7_0928600	conserved Plasmodium protein unknown function
PF3D7_1309800	conserved protein unknown function		PF3D7_1469300	pre-rRNA-processing protein PNO1 putative		PF3D7_0723400	conserved Plasmodium protein unknown function
PF3D7_1106000	RuvB-like helicase 2		PF3D7_1252800	Plasmodium exported protein (PHISTb) unknown function		PF3D7_1430300	acid phosphatase putative
PF3D7_0513500	mitochondrial import inner membrane translocase subunit TIM16 putative		PF3D7_1026600	conserved Plasmodium protein unknown function
PF3D7_1401200	Plasmodium exported protein unknown function		PF3D7_1471000	RNA 3'-terminal phosphate cyclase-like protein putative
PF3D7_0304900	conserved protein unknown function		PF3D7_0829600	early transcribed membrane protein 8
PF3D7_0507900	conserved Plasmodium protein unknown function		PF3D7_0424900	Plasmodium exported protein (PHISTa) unknown function
PF3D7_0607400	G-protein associated signal transduction protein putative		PF3D7_1136600	conserved Plasmodium protein unknown function
PF3D7_1370100	tRNA Cysteine		PF3D7_0717900	thioredoxin-like protein
PF3D7_1234800	splicing factor 3B subunit 3 putative		PF3D7_1405800	ribosome biogenesis protein BOP1 putative
PF3D7_1457300	MA3 domain-containing protein putative		PF3D7_1035000	U2 snRNA/tRNA pseudouridine synthase putative
PF3D7_1461200	U3 small nucleolar ribonucleoprotein protein IMP3 putative		PF3D7_1310700	RNA-binding protein putative
PF3D7_1368600	mitochondrial import inner membrane translocase subunit TIM9 putative		PF3D7_1036500	conserved Plasmodium protein unknown function
PF3D7_1116200	pyridoxine biosynthesis protein PDX2		PF3D7_0101300	Pfmc-2TM Maurer's cleft two transmembrane protein
PF3D7_1407800	plasmepsin IV		PF3D7_0518700	mRNA-binding protein PUF1
PF3D7_1115500	AP2 domain transcription factor putative		PF3D7_1407600	conserved Plasmodium protein unknown function
PF3D7_1325100	phosphoribosylpyrophosphate synthetase		PF3D7_1342600	myosin A
PF3D7_0731400	serine/threonine protein kinase FIKK family pseudogene		PF3D7_0108500	conserved Plasmodium protein unknown function
PF3D7_1016400	serine/threonine protein kinase FIKK family		PF3D7_0906400	dynein intermediate light chain putative
PF3D7_0110700	chromatin assembly factor 1 protein WD40 domain putative		PF3D7_1315000	conserved Plasmodium protein unknown function
PF3D7_1309900	conserved Plasmodium protein unknown function		PF3D7_1040300	rifin
PF3D7_0208700	conserved Plasmodium protein unknown function unspecified product		PF3D7_1420700	surface protein P113
PF3D7_0702700	tRNA Alanine		PF3D7_1335000	MSP7-like protein
PF3D7_1427800	exosome complex component RRP41		PF3D7_1017300	golgi re-assembly stacking protein 1 golgi re-assembly stacking protein 2
PF3D7_1361700	cytochrome c oxidase subunit 2 putative		PF3D7_0831000	Plasmodium exported protein (PHISTb) unknown function
PF3D7_0211800	asparagine--tRNA ligase		PF3D7_0928700	conserved Plasmodium protein unknown function
PF3D7_1248800	conserved Plasmodium protein unknown function		PF3D7_1474300	DNA repair metallo-beta-lactamase protein putative
PF3D7_0214500	conserved Plasmodium protein unknown function		PF3D7_0408000	conserved Plasmodium protein unknown function
PF3D7_1034900	methionine--tRNA ligase		PF3D7_0323500	survival motor neuron-like protein
PF3D7_1033400	haloacid dehalogenase-like hydrolase		PF3D7_1302200	protein UIS3
PF3D7_1409800	CUGBP Elav-like family member 2 putative		PF3D7_0824000	conserved Plasmodium protein unknown function
PF3D7_1208600	mitochondrial import inner membrane translocase subunit TIM10 putative		PF3D7_0415300	cdc2-related protein kinase 3
PF3D7_0415600	GTP:AMP phosphotransferase		PF3D7_1425400	DEAD/DEAH box helicase putative
PF3D7_0824400	nucleoside transporter 2		PF3D7_1219400	erythrocyte membrane protein 1 (PfEMP1) pseudogene
PF3D7_1117600	peptidyl-tRNA hydrolase ICT1		PF3D7_0314600	conserved protein unknown function
PF3D7_1251400	conserved Plasmodium protein unknown function		PF3D7_0402300	reticulocyte binding protein homologue 1
PF3D7_1126900	small nuclear ribonucleoprotein F putative		PF3D7_0830800	surface-associated interspersed protein 8.2 (SURFIN 8.2)
PF3D7_0922500	phosphoglycerate kinase		PF3D7_1367400	conserved Plasmodium protein unknown function
PF3D7_0203500	tRNA Glutamine		PF3D7_0717400	queuine tRNA-ribosyltransferase putative
PF3D7_0501000	Plasmodium exported protein unknown function		PF3D7_0322400	regulator of initiation factor 2 (eIF2)
PF3D7_1470300	conserved Plasmodium protein unknown function		PF3D7_0507500	subtilisin-like protease 1
			PF3D7_1023800	conserved Plasmodium protein unknown function
			PF3D7_1208500	conserved Plasmodium protein unknown function
			PF3D7_0830900	Plasmodium exported protein unknown function
			PF3D7_0524300	conserved Plasmodium protein unknown function
			PF3D7_0832200	Plasmodium exported protein (PHISTa-like) unknown function
			PF3D7_0702500	Plasmodium exported protein unknown function
			PF3D7_1133700	FHA domain-containing protein putative
			PF3D7_1136700	conserved Plasmodium protein unknown function
			PF3D7_1336000	conserved Plasmodium protein unknown function
			PF3D7_0617000	mitochondrial import receptor subunit TOM40 putative
			PF3D7_1247900	U3 small nucleolar RNA-associated protein 11 putative
			PF3D7_0406000	conserved protein unknown function
			PF3D7_1416800	lysine--tRNA ligase putative
			PF3D7_1002100	EMP1-trafficking protein
			PF3D7_1461600	splicing factor 3B subunit 2 putative
			PF3D7_0407600	conserved Plasmodium protein unknown function
			PF3D7_1405900	RNA-binding protein putative
			PF3D7_1443500	poly(A)-specific ribonuclease PARN putative
			PF3D7_0213500	tetratricopeptide repeat protein putative
			PF3D7_1011700	DNA repair protein RAD23 putative
			PF3D7_0815900	dihydrolipoyl dehydrogenase apicoplast
			PF3D7_1228900	conserved Plasmodium protein unknown function
			PF3D7_1339100	tRNA Methionine
			PF3D7_1415600	conserved Plasmodium protein unknown function
			PF3D7_0816000	ribosome assembly protein RRB1 putative
			PF3D7_1401100	DnaJ protein putative
			PF3D7_1251800	conserved Plasmodium protein unknown function
			PF3D7_0305200	conserved Plasmodium protein unknown function
			PF3D7_0402200	surface-associated interspersed protein 4.1 (SURFIN 4.1) pseudogene
			PF3D7_1246600	pre-mRNA-splicing factor CWC26 putative
			PF3D7_1036000	merozoite surface protein 11
			PF3D7_1456300	conserved Plasmodium protein unknown function
			PF3D7_0220700	Plasmodium exported protein (hyp9) unknown function
			PF3D7_0524900	S-adenosyl-L-methionine-dependent tRNA 4-demethylwyosine synthase putative
			PF3D7_0934500	V-type proton ATPase subunit E putative
			PF3D7_1463400	DNA-directed RNA polymerase III subunit RPC4 putative
			PF3D7_1301800	surface-associated interspersed protein 13.1 (SURFIN 13.1) pseudogene
			PF3D7_1236200	conserved Plasmodium protein unknown function
			PF3D7_1125800	kelch domain-containing protein putative
			PF3D7_1304200	CorA-like Mg2+ transporter protein putative
			PF3D7_0424700	serine/threonine protein kinase FIKK family
			PF3D7_1133100	conserved Plasmodium protein unknown function
			PF3D7_1461800	conserved Plasmodium protein unknown function
			PF3D7_1457700	large ribosomal subunit nuclear export factor putative
			PF3D7_1133400	apical membrane antigen 1
			PF3D7_1207400	conserved Plasmodium protein unknown function
			PF3D7_1000200	rifin
			PF3D7_1037500	dynamin-like protein
			PF3D7_1006700	conserved Plasmodium protein unknown function
			PF3D7_0701900	Plasmodium exported protein unknown function
			PF3D7_1122800	calcium-dependent protein kinase 6
			PF3D7_0805100	conserved Plasmodium protein unknown function
			PF3D7_0612900	nucleolar GTP-binding protein 1 putative
			PF3D7_0832300	Plasmodium exported protein (PHISTa-like) unknown function
			PF3D7_0928100	conserved Plasmodium protein unknown function
			PF3D7_1218800	secreted ookinete protein putative
			PF3D7_1372700	rifin
			PF3D7_1128600	CCR4-NOT transcription complex subunit 2 putative
			PF3D7_0113600	surface-associated interspersed protein 1.2 (SURFIN 1.2) pseudogene
			PF3D7_0830600	Plasmodium exported protein (PHISTc) unknown function
			PF3D7_1444500	eukaryotic translation initiation factor 2-alpha kinase 1
			PF3D7_1015200	cysteine--tRNA ligase
			PF3D7_0424200	reticulocyte binding protein homologue 4
			PF3D7_1241400	RNA-binding protein putative
			PF3D7_1340300	nucleolar complex protein 2 putative
			PF3D7_1027100	U3 small nucleolar ribonucleoprotein protein MPP10 putative
			PF3D7_1319000	conserved Plasmodium protein unknown function
			PF3D7_1314800	ubiquitin-like protein putative
			PF3D7_0601700	Plasmodium exported protein (PHISTa) unknown function pseudogene
			PF3D7_1252400	reticulocyte binding protein homologue 3 pseudogene
			PF3D7_0206200	pantothenate transporter
			PF3D7_0632400	rifin
			PF3D7_1358500	zinc finger protein putative
			PF3D7_1405100	GTPase-activating protein putative
			PF3D7_1343700	kelch protein K13
			PF3D7_1025000	EF-hand calcium-binding domain-containing protein putative
			PF3D7_0311200	valine--tRNA ligase putative
			PF3D7_1334300	MSP7-like protein
			PF3D7_1219700	raf kinase inhibitor
			PF3D7_1200900	Plasmodium exported protein (PHISTc) unknown function
			PF3D7_1039000	serine/threonine protein kinase FIKK family
			PF3D7_1032700	conserved Plasmodium protein unknown function
			PF3D7_0702600	chitinase precursor fragment truncated
			PF3D7_0713100	Pfmc-2TM Maurer's cleft two transmembrane protein
			PF3D7_1462400	conserved Plasmodium protein unknown function
			PF3D7_1249100	conserved protein unknown function
			PF3D7_1115800	conserved Plasmodium protein unknown function
			PF3D7_1358600	zinc finger protein putative
			PF3D7_1224400	WD repeat-containing protein putative
			PF3D7_1140600	conserved Plasmodium protein unknown function
			PF3D7_0102500	erythrocyte binding antigen-181
			PF3D7_1450600	S-adenosylmethionine-dependent methyltransferase putative
			PF3D7_0205100	conserved Plasmodium protein unknown function
			PF3D7_0816900	adenylate kinase 2
			PF3D7_1140200	conserved Plasmodium protein unknown function
			PF3D7_1233200	conserved Plasmodium protein unknown function
			PF3D7_0316000	microneme associated antigen
			PF3D7_0219800	Plasmodium exported protein (PHISTc) unknown function
			PF3D7_0526500	conserved Plasmodium protein unknown function
			PF3D7_1325800	conserved Plasmodium protein unknown function
			PF3D7_1401600	Plasmodium exported protein (PHISTb) unknown function
			PF3D7_1323900	protein BCP1 putative
			PF3D7_1201300	liver stage associated protein 1
			PF3D7_0933000	CSTF domain-containing protein putative
			PF3D7_1033000	heptatricopeptide repeat-containing protein HPR1 putative
			PF3D7_1141900	inner membrane complex protein 1b putative
			PF3D7_0108800	mitochondrial carrier protein putative
			PF3D7_1035500	merozoite surface protein 6
			PF3D7_1026300	conserved Plasmodium protein unknown function
			PF3D7_1351600	glycerol kinase
			PF3D7_1216600	cell traversal protein for ookinetes and sporozoites
			PF3D7_0622200	radical SAM protein putative
			PF3D7_0502400	merozoite surface protein 8
			PF3D7_1302900	conserved protein unknown function
			PF3D7_0617700	rifin
			PF3D7_1469100	conserved Plasmodium protein unknown function
			PF3D7_0935900	ring-exported protein 1
			PF3D7_0914900	BSD-domain protein putative
			PF3D7_1241500	conserved Plasmodium protein unknown function
			PF3D7_1373400	rifin
			PF3D7_1448600	SNARE protein putative
			PF3D7_1126000	threonine--tRNA ligase
			PF3D7_0829200	prohibitin 1 putative
			PF3D7_1200700	acyl-CoA synthetase
			PF3D7_0302300	erythrocyte membrane protein 1 (PfEMP1) pseudogene
			PF3D7_1311100	meiosis-specific nuclear structural protein 1 putative
			PF3D7_0407900	AAA family ATPase putative
			PF3D7_0729300	60S ribosomal export protein NMD3 putative
			PF3D7_0716200	PDCD2 domain-containing protein putative
			PF3D7_1427100	lipase putative
			PF3D7_1146000	ribosome assembly protein 4 putative
			PF3D7_1200200	rifin
			PF3D7_1432500	RNA methyltransferase putative
			PF3D7_0300900	stevor-like
			PF3D7_1344100	TLD domain-containing protein putative
			PF3D7_1318300	conserved Plasmodium protein unknown function
			PF3D7_1140800	conserved Plasmodium protein unknown function
			PF3D7_1123100	calcium-dependent protein kinase 7
			PF3D7_0701600	Pfmc-2TM Maurer's cleft two transmembrane protein
			PF3D7_0902500	serine/threonine protein kinase FIKK family
			PF3D7_1207800	conserved Plasmodium protein unknown function
			PF3D7_1316200	ADP-ribosylation factor putative
			PF3D7_1106300	exonuclease putative
			PF3D7_1221400	inner membrane complex protein 1h putative
			PF3D7_1214500	conserved Plasmodium protein unknown function
			PF3D7_1020400	rRNA (cytosine-C(5))-methyltransferase putative
			PF3D7_1016000	conserved Plasmodium protein unknown function
			PF3D7_0623800	tyrosine kinase-like protein putative
			PF3D7_0613600	conserved Plasmodium protein unknown function
			PF3D7_0525300	conserved protein unknown function
			PF3D7_0822900	conserved Plasmodium protein unknown function
			PF3D7_0716100	protein SDA1 putative
			PF3D7_0202400	translation-enhancing factor
			PF3D7_1453900	conserved Plasmodium protein unknown function
			PF3D7_0727200	cysteine desulfurase putative
			PF3D7_1226700	U3 small nucleolar RNA-interacting protein 2 putative
			PF3D7_1455300	conserved protein unknown function
			PF3D7_0913900	arginine--tRNA ligase putative
			PF3D7_1015300	methionine aminopeptidase 1b putative
			PF3D7_1422400	conserved Plasmodium protein unknown function
			PF3D7_0220100	DnaJ protein putative
			PF3D7_1473900	conserved Plasmodium protein unknown function
			PF3D7_0424100	reticulocyte binding protein homologue 5
			PF3D7_1005100	U3 small nucleolar RNA-associated protein 25 putative
			PF3D7_0725300	conserved protein unknown function
			PF3D7_1352100	ABC transporter B family member 6 putative
			PF3D7_1337800	calcium-dependent protein kinase 5
			PF3D7_0517200	conserved Plasmodium protein unknown function
			PF3D7_0919200	PPPDE peptidase putative
			PF3D7_1310400	conserved Plasmodium protein unknown function
			PF3D7_1230100	thioredoxin-like associated protein 1 putative
			PF3D7_0425500	stevor
			PF3D7_1231200	conserved Plasmodium protein unknown function
			PF3D7_0818100	zinc finger protein putative
			PF3D7_0113800	DBL containing protein unknown function
			PF3D7_0609700	conserved Plasmodium protein unknown function
			PF3D7_0605600	nucleoside diphosphate kinase putative
			PF3D7_0721300	ATP-dependent RNA helicase DBP7 putative
			PF3D7_1359100	riboflavin kinase putative
			PF3D7_1314700	pinin/SDK/MemA domain-containing protein putative
			PF3D7_1102500	Plasmodium exported protein (PHISTb) unknown function
			PF3D7_1202700	conserved Plasmodium protein unknown function
			PF3D7_1013400	conserved Plasmodium protein unknown function
			PF3D7_1420300	DNL-type zinc finger protein
			PF3D7_1319100	ubiquitin carboxyl-terminal hydrolase MINDY putative
			PF3D7_0401700	Plasmodium exported protein unknown function pseudogene
			PF3D7_0902700	Plasmodium exported protein (PHISTb) unknown function pseudogene
			PF3D7_0923400	conserved Plasmodium protein unknown function
			PF3D7_1331500	conserved Plasmodium protein unknown function
			PF3D7_1401900	conserved protein unknown function
			PF3D7_0603600	conserved Plasmodium protein unknown function
			PF3D7_0730100	tRNA pseudouridine synthase D putative
			PF3D7_0700200	rifin
			PF3D7_1039700	Pfmc-2TM Maurer's cleft two transmembrane protein
			PF3D7_1150400	erythrocyte membrane protein 1 PfEMP1
			PF3D7_0826600	SNARE protein putative
			PF3D7_1035300	glutamate-rich protein GLURP
			PF3D7_0501100	heat shock protein 40 type II
			PF3D7_1415200	DNA-directed RNA polymerases I and III subunit RPAC2 putative
			PF3D7_1238900	protein kinase 2
			PF3D7_1476000	conserved Plasmodium protein unknown function
			PF3D7_1453100	dynactin subunit 4 putative
			PF3D7_0104200	StAR-related lipid transfer protein
			PF3D7_0402000	Plasmodium exported protein (PHISTa) unknown function
			PF3D7_0824600	Fe-S cluster assembly protein DRE2 putative
			PF3D7_0919300	thioredoxin-like protein 1 putative
			PF3D7_1468900	conserved Plasmodium protein unknown function
			PF3D7_1334400	MSP7-like protein
			PF3D7_1465600	conserved Plasmodium protein unknown function
			PF3D7_0818300	dynactin subunit 6 putative
			PF3D7_0501300	skeleton-binding protein 1
			PF3D7_0532300	Plasmodium exported protein (PHISTb) unknown function
			PF3D7_0814700	conserved Plasmodium protein unknown function
			PF3D7_0936000	ring-exported protein 2
			PF3D7_1473700	nucleoporin NUP116/NSP116 putative
			PF3D7_1028400	nucleolar preribosomal assembly protein putative
			PF3D7_0411000	conserved Plasmodium protein unknown function
			PF3D7_1204900	conserved Plasmodium protein unknown function
			PF3D7_0420300	AP2 domain transcription factor putative
			PF3D7_1351700	inner membrane complex protein 1f putative
			PF3D7_0319700	ABC transporter I family member 1 putative
			PF3D7_0824500	conserved protein unknown function
			PF3D7_1431200	OST-HTH associated domain protein putative
			PF3D7_1140700	conserved Plasmodium protein unknown function
			PF3D7_1370300	membrane associated histidine-rich protein 1
			PF3D7_1464600	serine/threonine protein phosphatase UIS2 putative
			PF3D7_0927200	zinc finger protein putative
			PF3D7_1353100	Plasmodium exported protein unknown function
			PF3D7_0903600	conserved protein unknown function unspecified product
			PF3D7_0907600	translation initiation factor SUI1 putative
			PF3D7_1403000	conserved Plasmodium protein unknown function
			PF3D7_1474000	conserved Plasmodium protein unknown function
			PF3D7_0924000	patatin-like phospholipase putative
			PF3D7_1116800	heat shock protein 101
			PF3D7_1215300	10 kDa chaperonin
			PF3D7_1206600	DNA-directed RNA polymerase III subunit RPC2 putative
			PF3D7_0223400	rifin
			PF3D7_0210600	conserved protein unknown function
			PF3D7_0418700	RNA-binding protein NOB1 putative
			PF3D7_0404000	conserved Plasmodium protein unknown function
			PF3D7_1417300	cysteine protease ATG4 putative
			PF3D7_1035800	probable protein unknown function
			PF3D7_1034300	thioredoxin-like associated protein 2 putative
			PF3D7_1330800	RNA-binding protein putative
			PF3D7_1209400	cytosolic iron-sulfur protein assembly protein 1 putative
			PF3D7_1212300	WD repeat-containing protein putative
			PF3D7_0702100	Plasmodium exported protein (PHISTb) unknown function pseudogene
			PF3D7_1447500	inner membrane complex protein putative
			PF3D7_0208200	KRR1 small subunit processome component putative
			PF3D7_0819800	conserved Plasmodium protein unknown function
			PF3D7_1210400	general transcription factor 3C polypeptide 5 putative
			PF3D7_1238300	pre-mRNA-splicing factor CWC22 putative
			PF3D7_1118500	nucleolar protein 56 putative
			PF3D7_1445200	ATP-dependent RNA helicase MAK5 putative
			PF3D7_1241900	tetratricopeptide repeat protein putative
			PF3D7_0625000	sphingomyelin synthase 1 putative
			PF3D7_1248400	conserved Plasmodium protein unknown function
			PF3D7_0723100	protein CPH1 putative
			PF3D7_1038600	Plasmodium exported protein unknown function
			PF3D7_1334200	chaperone binding protein putative
			PF3D7_1321000	conserved Plasmodium protein unknown function
			PF3D7_0600200	erythrocyte membrane protein 1 PfEMP1

## Sheet: Upreg_Overlap
CQ 3D7 MFQ 3D7 MK 3D7 MK Dd2 (n=7)			CQ 3D7 MK 3D7 MK Dd2 (n=11)			CQ 3D7 MFQ 3D7 MK 3D7 (n=10)			MFQ 3D7 MK 3D7 MK Dd2 (n=51)			CQ 3D7 MK 3D7 (n=28)			MK 3D7 MK Dd2 (n=54)			MFQ 3D7 MK 3D7 (n=87)			CQ 3D7 MFQ 3D7 (n=7)			MFQ 3D7 MK Dd2 (n=4)			CQ 3D7 MK Dd2 (n=1)
Gene Id	Product		Gene Id	Product		Gene Id	Product		Gene Id	Product		Gene Id	Product		Gene Id	Product		Gene Id	Product		Gene Id	Product		Gene Id	Product		Gene Id	Product
PF3D7_0525000	zinc finger protein putative		PF3D7_0532500	Plasmodium exported protein unknown function		PF3D7_1008800	nucleolar protein 5 putative		PF3D7_1226000	conserved protein unknown function		PF3D7_1323000	beta-hydroxyacyl-ACP dehydratase		PF3D7_1002200	tryptophan-rich antigen 3		PF3D7_1431100	PhIL1 interacting protein PIP2		PF3D7_0623000	chorismate synthase		PF3D7_1468000	conserved Plasmodium protein unknown function		PF3D7_0527900	ATP-dependent RNA helicase DDX41 putative
PF3D7_1435700	ataxin-2 like protein putative		PF3D7_0532600	Plasmodium exported protein unknown function		PF3D7_1435800	GTPase Era putative		PF3D7_0704200	tRNA m5C-methyltransferase putative		PF3D7_0726100	Plasmodium exported protein unknown function		PF3D7_0824100	exonuclease putative		PF3D7_1101300	rifin		PF3D7_1124700	GrpE protein homolog mitochondrial putative		PF3D7_0213100	protein SIS1
PF3D7_1354600	60S ribosomal protein L7-2 putative		PF3D7_1015600	heat shock protein 60		PF3D7_1472900	dihydroorotase putative		PF3D7_1425600	zinc finger protein putative		PF3D7_1402700	U2 snRNP-associated SURP motif-containing protein putative		PF3D7_0220600	Plasmodium exported protein (hyp9) unknown function		PF3D7_0414400	conserved Plasmodium protein unknown function		PF3D7_1017400	phosphomannomutase putative		PF3D7_1225400	rRNA-processing protein putative
PF3D7_0106400	pre-rRNA-processing protein TSR2 putative		PF3D7_1351800	conserved Plasmodium protein unknown function		PF3D7_0802400	conserved Plasmodium protein unknown function		PF3D7_1365500	aminomethyltransferase mitochondrial putative		PF3D7_0424000	Plasmodium exported protein (PHISTc) unknown function		PF3D7_1450000	serine/threonine protein kinase putative		PF3D7_1372000	Plasmodium exported protein (PHISTa) unknown function		PF3D7_1345100	thioredoxin 2		PF3D7_1414600	mRNA-capping enzyme subunit alpha
PF3D7_1425900	conserved Plasmodium protein unknown function		PF3D7_1118200	heat shock protein 90 putative		PF3D7_0818800	U3 small nucleolar ribonucleoprotein protein IMP4 putative		PF3D7_0113400	Plasmodium exported protein unknown function		PF3D7_0921200	conserved Plasmodium membrane protein unknown function		PF3D7_1148700	Plasmodium exported protein (PHISTc) unknown function		PF3D7_0421900	conserved Plasmodium protein unknown function		PF3D7_1417500	H/ACA ribonucleoprotein complex subunit 4 putative
PF3D7_1338800	CPW-WPC family protein		PF3D7_1149400	Plasmodium exported protein unknown function		PF3D7_1473500	conserved Plasmodium protein unknown function		PF3D7_0708200	conserved Plasmodium protein unknown function		PF3D7_0819500	conserved protein unknown function		PF3D7_1324000	conserved Plasmodium protein unknown function		PF3D7_1040500	rifin		PF3D7_1230600	sun-family protein putative
PF3D7_0702400	small exported membrane protein 1		PF3D7_0601900	conserved Plasmodium protein unknown function		PF3D7_1302000	EMP1-trafficking protein		PF3D7_1016500	Plasmodium exported protein (PHISTc) unknown function		PF3D7_0621200	pyridoxine biosynthesis protein PDX1		PF3D7_1429200	AP2 domain transcription factor AP2-O3 putative		PF3D7_1438500	cleavage and polyadenylation specificity factor subunit 3 putative		PF3D7_1357800	T-complex protein 1 subunit delta
			PF3D7_1355300	histone-lysine N-methyltransferase putative		PF3D7_0925400	protein phosphatase-beta		PF3D7_1218900	WD repeat-containing protein putative		PF3D7_1237400	hydrolase putative		PF3D7_0203700	protein MAK16 putative		PF3D7_1464200	zinc finger protein putative
			PF3D7_1201000	Plasmodium exported protein (PHISTb) unknown function		PF3D7_1129100	parasitophorous vacuolar protein 1		PF3D7_1466200	early gametocyte enriched phosphoprotein EGXP		PF3D7_1454600	mitochondrial ribosomal protein S11 precursor putative		PF3D7_1114200	GTPase-activating protein putative		PF3D7_0731800	alpha/beta hydrolase putative
			PF3D7_0830700	Plasmodium exported protein (hyp9) unknown function		PF3D7_0602200	MYND-type zinc finger protein putative		PF3D7_1221900	conserved Plasmodium membrane protein unknown function		PF3D7_1423000	nucleolar GTP-binding protein 2 putative		PF3D7_1038700	Plasmodium exported protein unknown function		PF3D7_1454000	RNA-binding protein putative
			PF3D7_0501200	parasite-infected erythrocyte surface protein					PF3D7_0936800	Plasmodium exported protein (PHISTc) unknown function		PF3D7_1141700	OTU domain-containing protein putative		PF3D7_0906600	zinc finger protein putative		PF3D7_0425900	rifin
									PF3D7_0924100	conserved Plasmodium protein unknown function		PF3D7_1115700	cysteine proteinase falcipain 2a		PF3D7_0202300	Plasmodium exported protein (hyp11) unknown function		PF3D7_0422900	methyltransferase putative
									PF3D7_0215200	conserved Plasmodium protein unknown function		PF3D7_0831700	heat shock protein 70		PF3D7_0206300	pentafunctional AROM polypeptide putative pseudogene		PF3D7_0102400	lysophospholipase putative pseudogene
									PF3D7_1227800	elongator complex protein 3 putative		PF3D7_1456800	V-type H(+)-translocating pyrophosphatase putative		PF3D7_1434300	Hsp70/Hsp90 organizing protein		PF3D7_0115600	rifin
									PF3D7_0501400	interspersed repeat antigen		PF3D7_1116700	dipeptidyl aminopeptidase 1		PF3D7_1467200	WD repeat-containing protein 79 putative		PF3D7_1103500	CPW-WPC family protein
									PF3D7_1419900	cleavage and polyadenylation specificity factor subunit 4 putative		PF3D7_1421400	DNA-directed RNA polymerase III subunit RPC6 putative		PF3D7_1352200	U3 small nucleolar RNA-associated protein 15 putative		PF3D7_0322600	conserved Plasmodium protein unknown function
									PF3D7_1206500	Tat binding protein 1(TBP-1)-interacting protein putative		PF3D7_1454400	aminopeptidase P		PF3D7_0522300	18S rRNA (guanine-N(7))-methyltransferase putative		PF3D7_0632500	erythrocyte membrane protein 1 PfEMP1
									PF3D7_1404800	conserved Plasmodium protein unknown function		PF3D7_1115300	cysteine proteinase falcipain 2b		PF3D7_0817100	tRNA modification GTPase putative		PF3D7_1431300	large subunit GTPase 1 putative
									PF3D7_0804300	zinc finger protein putative		PF3D7_0608800	ornithine aminotransferase		PF3D7_1246500	methyltransferase putative		PF3D7_0215300	acyl-CoA synthetase
									PF3D7_0902600	serine/threonine protein kinase FIKK family		PF3D7_0401600	rifin		PF3D7_1411500	conserved Plasmodium protein unknown function		PF3D7_0219700	Plasmodium exported protein (PHISTc) unknown function
									PF3D7_1436300	translocon component PTEX150		PF3D7_1359500	conserved Plasmodium protein unknown function		PF3D7_0711400	histone deacetylase complex subunit SAP18 putative		PF3D7_1355600	PhIL1 interacting protein PIP1
									PF3D7_0801000	Plasmodium exported protein (PHISTc) unknown function		PF3D7_1028000	methyltransferase putative		PF3D7_0730900	EMP1-trafficking protein		PF3D7_1428400	WD and tetratricopeptide repeats protein 1 putative
									PF3D7_0925200	ribosomal RNA-processing protein 8 putative		PF3D7_1336800	nuclear movement protein putative		PF3D7_0705000	mRNA cap guanine-N7 methyltransferase putative		PF3D7_0402100	Plasmodium exported protein (PHISTb) unknown function
									PF3D7_0114000	exported protein family 1		PF3D7_0520600	bis(5'-nucleosyl)-tetraphosphatase [asymmetrical]		PF3D7_0826000	conserved Plasmodium protein unknown function		PF3D7_0920000	long chain fatty acid elongation enzyme putative
									PF3D7_0404600	conserved Plasmodium membrane protein unknown function		PF3D7_1469400	nucleoside transporter 3 putative		PF3D7_1317200	AP2 domain transcription factor AP2-G3 putative		PF3D7_1423200	peptidyl-prolyl cis-trans isomerase
									PF3D7_1467600	conserved Plasmodium protein unknown function		PF3D7_1357900	pyrroline-5-carboxylate reductase putative		PF3D7_1134700	DNA-directed RNA polymerase I subunit RPA2 putative		PF3D7_0630900	ATP-dependent RNA helicase HAS1
									PF3D7_1016800	Plasmodium exported protein (PHISTc) unknown function		PF3D7_1322700	conserved Plasmodium protein unknown function		PF3D7_1038800	RESA-like protein with PHIST and DnaJ domains		PF3D7_1102600	Plasmodium exported protein unknown function
									PF3D7_1215100	SUN domain-containing protein putative		PF3D7_1324400	PRELI domain-containing protein putative		PF3D7_0401900	acyl-CoA synthetase		PF3D7_0509400	RNA polymerase I
									PF3D7_0822400	conserved Plasmodium protein unknown function					PF3D7_1125400	mitochondrial import inner membrane translocase subunit TIM44 putative		PF3D7_0410000	erythrocyte vesicle protein 1
									PF3D7_0902300	serine/threonine protein kinase FIKK family					PF3D7_1134600	zinc finger protein putative		PF3D7_1412500	actin II
									PF3D7_0214300	conserved Plasmodium protein unknown function					PF3D7_0114500	Plasmodium exported protein (hyp10) unknown function		PF3D7_0731200	Plasmodium exported protein unknown function
									PF3D7_0406500	NYN domain-containing protein putative					PF3D7_1301400	Plasmodium exported protein (hyp12) unknown function		PF3D7_1401300	epoxide hydrolase 2
									PF3D7_1322400	conserved Plasmodium protein unknown function					PF3D7_1207100	small subunit rRNA processing factor putative		PF3D7_0100300	erythrocyte membrane protein 1 PfEMP1
									PF3D7_1102300	Plasmodium exported protein unknown function					PF3D7_0731300	Plasmodium exported protein (PHISTb) unknown function		PF3D7_0918700	conserved Plasmodium protein unknown function
									PF3D7_1442400	conserved Plasmodium protein unknown function					PF3D7_1217200	multiple RNA-binding domain-containing protein 1 putative		PF3D7_1300500	rifin
									PF3D7_0812000	conserved protein unknown function					PF3D7_0818900	heat shock protein 70		PF3D7_0632700	rifin
									PF3D7_0304200	EH domain-containing protein					PF3D7_0312900	hypothetical protein		PF3D7_0912600	conserved Plasmodium protein unknown function
									PF3D7_0931100	nucleolar protein Nop52 putative					PF3D7_0622900	AP2 domain transcription factor AP2Tel		PF3D7_1016700	Plasmodium exported protein (PHISTc) unknown function
									PF3D7_0218400	ATP-dependent RNA helicase DDX47 putative					PF3D7_0630100	conserved Plasmodium protein unknown function		PF3D7_1107600	conserved Plasmodium protein unknown function
									PF3D7_0800700	surface-associated interspersed protein 8.3 (SURFIN 8.3)					PF3D7_1401500	esterase putative		PF3D7_0424500	serine/threonine protein kinase FIKK family
									PF3D7_0315600	zinc finger protein putative					PF3D7_1139300	AP2 domain transcription factor putative		PF3D7_0304600	circumsporozoite (CS) protein
									PF3D7_0801900	lysine-specific histone demethylase putative					PF3D7_0830500	sporozoite and liver stage tryptophan-rich protein putative		PF3D7_1149600	DnaJ protein putative
									PF3D7_0102600	serine/threonine protein kinase FIKK family					PF3D7_1030600	tRNA N6-adenosine threonylcarbamoyltransferase		PF3D7_0220400	DnaJ protein putative pseudogene
									PF3D7_1124800	ribosome biogenesis regulatory protein putative					PF3D7_0831400	Plasmodium exported protein unknown function		PF3D7_0314700	RING finger protein RNF1
									PF3D7_0113300	Plasmodium exported protein (hyp1) unknown function					PF3D7_0301600	Plasmodium exported protein (hyp1) unknown function		PF3D7_1248100	methyltransferase putative
									PF3D7_1107700	pescadillo homolog					PF3D7_1032100	mRNA-decapping enzyme subunit 1 putative		PF3D7_1253100	Plasmodium exported protein (PHISTa) unknown function
									PF3D7_0729400	ribosome biogenesis protein BRX1 putative					PF3D7_1349200	glutamate--tRNA ligase putative		PF3D7_0212600	secreted protein with altered thrombospondin repeat domain
									PF3D7_0401800	Plasmodium exported protein (PHISTb) unknown function					PF3D7_0801500	nucleolar protein 10 putative		PF3D7_0926600	conserved Plasmodium membrane protein unknown function
									PF3D7_0936400	ring-exported protein 4					PF3D7_1230800	pre-mRNA-splicing regulator putative		PF3D7_0808900	rifin
									PF3D7_1200800	serine/threonine protein kinase FIKK family					PF3D7_0214400	conserved protein unknown function		PF3D7_0625600	poly(A) polymerase PAP putative
									PF3D7_0606100	RNA-binding protein putative					PF3D7_1107800	AP2 domain transcription factor putative		PF3D7_1412600	deoxyhypusine synthase
															PF3D7_0825500	protein KRI1 putative		PF3D7_1036300	duffy binding-like merozoite surface protein 2
															PF3D7_1007800	conserved Plasmodium protein unknown function		PF3D7_1305700	conserved Plasmodium protein unknown function
															PF3D7_0218700	pre-mRNA-processing protein 45 putative		PF3D7_0730000	conserved protein unknown function
																		PF3D7_0732900	rifin
																		PF3D7_1207900	conserved Plasmodium protein unknown function
																		PF3D7_1466600	enkurin domain-containing protein putative
																		PF3D7_1226100	haloacid dehalogenase-like hydrolase putative
																		PF3D7_0713300	erythrocyte membrane protein 1 (PfEMP1) pseudogene
																		PF3D7_1305900	conserved Plasmodium protein unknown function
																		PF3D7_0400500	rifin
																		PF3D7_0625400	conserved Plasmodium protein unknown function
																		PF3D7_1466800	conserved Plasmodium protein unknown function
																		PF3D7_0405000	ATP-dependent RNA helicase DDX51 putative
																		PF3D7_0424600	Plasmodium exported protein (PHISTb) unknown function
																		PF3D7_0113000	glutamic acid-rich protein
																		PF3D7_1201100	RESA-like protein with PHIST and DnaJ domains
																		PF3D7_1235100	conserved protein unknown function
																		PF3D7_1415300	RNA-binding protein Nova-1 putative
																		PF3D7_0512400	conserved Plasmodium protein unknown function
																		PF3D7_1445400	protein serine/threonine kinase-1
																		PF3D7_1124500	pyruvate dehydrogenase E1 component subunit alpha
																		PF3D7_1300200	rifin
																		PF3D7_0113700	heat shock protein 40 type II
																		PF3D7_1442600	TRAP-like protein
																		PF3D7_0821500	ribosomal RNA small subunit methyltransferase NEP1 putative
																		PF3D7_0406600	conserved protein unknown function
																		PF3D7_0833400	rifin
																		PF3D7_0912200	conserved protein unknown function
																		PF3D7_1029100	conserved Plasmodium protein unknown function
																		PF3D7_1001400	exported lipase 1
																		PF3D7_1350900	AP2 domain transcription factor AP2-O4 putative
																		PF3D7_0628600	DNA methyltransferase 1-associated protein 1 putative
																		PF3D7_0627600	conserved Plasmodium protein unknown function
																		PF3D7_0902800	serine repeat antigen 9
																		PF3D7_1149300	serine/threonine protein kinase FIKK family
																		PF3D7_1362700	conserved Plasmodium protein unknown function

## Sheet: Downreg_Found in single drug
CQ 3D7 (n=53)			MK 3D7 (n=171)			MK Dd2 (n=63)			MFQ 3D7 (n=26)
Gene Id	Product		Gene Id	Product		Gene Id	Product		Gene Id	Product
PF3D7_0321100	conserved Plasmodium protein unknown function		PF3D7_1314600	lipoate-protein ligase 1		PF3D7_1236900	conserved Plasmodium protein unknown function		PF3D7_1403100	condensin complex subunit 1 putative
PF3D7_0803200	filament assembling protein putative		PF3D7_0626800	pyruvate kinase		PF3D7_0507400	conserved Plasmodium protein unknown function		PF3D7_1322800	conserved protein unknown function
PF3D7_1356800	serine/threonine protein kinase putative		PF3D7_1239800	conserved Plasmodium protein unknown function		PF3D7_1323700	glideosome associated protein with multiple membrane spans 1		PF3D7_0419600	ran-specific GTPase-activating protein 1 putative
PF3D7_0933500	gamma-tubulin complex component putative		PF3D7_1303800	conserved Plasmodium protein unknown function		PF3D7_1320700	conserved Plasmodium protein unknown function		PF3D7_1426600	conserved Plasmodium protein unknown function
PF3D7_1121100	conserved protein unknown function		PF3D7_1427500	DNA mismatch repair protein MSH2 putative		PF3D7_1108600	endoplasmic reticulum-resident calcium binding protein		PF3D7_0305600	DNA-(apurinic or apyrimidinic site) lyase putative
PF3D7_1112100	conserved Plasmodium protein unknown function		PF3D7_1414400	serine/threonine protein phosphatase PP1		PF3D7_0513300	purine nucleoside phosphorylase		PF3D7_0513200	conserved Plasmodium protein unknown function
PF3D7_1227400	conserved Plasmodium protein unknown function		PF3D7_1250500	AP-3 complex subunit sigma putative		PF3D7_0404800	conserved Plasmodium protein unknown function		PF3D7_0519900	conserved protein unknown function
PF3D7_0828300	conserved protein unknown function		PF3D7_0508500	guanidine nucleotide exchange factor		PF3D7_1439600	cytochrome c oxidase subunit ApiCOX26 putative		PF3D7_0819700	conserved Plasmodium protein unknown function
PF3D7_0827600	conserved Plasmodium protein unknown function		PF3D7_0506900	rhomboid protease ROM4		PF3D7_0417500	memo-like protein		PF3D7_1462100	conserved Plasmodium protein unknown function
PF3D7_1138400	guanylyl cyclase		PF3D7_0210200	conserved Plasmodium protein unknown function		PF3D7_1235600	serine hydroxymethyltransferase		PF3D7_0104800	novel putative transporter 1 putative
PF3D7_0705500	inositol-phosphate phosphatase putative		PF3D7_1017900	26S proteasome regulatory subunit p55 putative		PF3D7_1412800	glycylpeptide N-tetradecanoyltransferase		PF3D7_1123800	structural maintenance of chromosomes protein 5 putative
PF3D7_0530200	phosphoenolpyruvate/phosphate translocator		PF3D7_1111400	conserved Plasmodium protein unknown function		PF3D7_0205900	26S proteasome regulatory subunit RPN1 putative		PF3D7_0307500	spindle and kinetochore-associated protein 2 putative
PF3D7_0203000	repetitive organellar protein putative		PF3D7_0621100	conserved Plasmodium protein unknown function		PF3D7_1359800	ADP-ribosylation factor putative		PF3D7_1340700	ras-related protein Rab-11B
PF3D7_0629700	SET domain protein putative		PF3D7_1233600	asparagine and aspartate rich protein 1		PF3D7_1014900	conserved Plasmodium protein unknown function		PF3D7_0817400	phosphatase putative
PF3D7_1035600	merozoite surface protein		PF3D7_1227000	conserved Plasmodium protein unknown function		PF3D7_1453400	gamma-tubulin complex component putative		PF3D7_0320900	histone H2A.Z
PF3D7_1231100	ras-related protein Rab-2		PF3D7_0217800	40S ribosomal protein S26		PF3D7_0624700	N-acetylglucosaminyl-phosphatidylinositol de-N-acetylase putative		PF3D7_1128700	GPI-anchor transamidase putative
PF3D7_0710200	conserved Plasmodium protein unknown function		PF3D7_1447700	conserved protein unknown function		PF3D7_0413600	26S protease regulatory subunit 6B putative		PF3D7_0903700	alpha tubulin 1
PF3D7_1207000	conserved Plasmodium protein unknown function		PF3D7_1242700	40S ribosomal protein S17 putative		PF3D7_1472600	protein disulfide-isomerase		PF3D7_1251300	thymidylate kinase
PF3D7_1208400	amino acid transporter putative		PF3D7_0422800	serpentine receptor putative		PF3D7_1471400	diacylglycerol kinase putative		PF3D7_0821400	conserved Plasmodium protein unknown function
PF3D7_1442900	protein transport protein SEC7 putative		PF3D7_0523900	MerC domain-containing protein putative		PF3D7_0709400	Cg7 protein		PF3D7_1435400	ER membrane protein complex subunit 4 putative
PF3D7_0208100	conserved Plasmodium protein unknown function		PF3D7_1334800	MSP7-like protein		PF3D7_1310200	conserved Plasmodium protein unknown function		PF3D7_1465100	conserved oligomeric Golgi complex subunit 6 putative
PF3D7_1116000	rhoptry neck protein 4		PF3D7_0507700	nuclear protein localization protein 4 putative		PF3D7_1463900	EF-hand calcium-binding domain-containing protein putative		PF3D7_0804400	methionine aminopeptidase 1c putative
PF3D7_1008100	zinc finger protein putative		PF3D7_0518200	SWIB/MDM2 domain-containing protein		PF3D7_0220800	cytoadherence linked asexual protein 2		PF3D7_0103200	nucleoside transporter 4
PF3D7_1113000	conserved Plasmodium protein unknown function		PF3D7_0206800	merozoite surface protein 2		PF3D7_1318700	conserved protein unknown function		PF3D7_0916400	conserved Plasmodium protein unknown function
PF3D7_1116100	serine esterase putative		PF3D7_1022900	CDGSH iron-sulfur domain-containing protein putative		PF3D7_1144900	ras-related protein Rab-6		PF3D7_1458100	protein PET117 putative
PF3D7_1206300	conserved Plasmodium protein unknown function		PF3D7_1031700	protein phosphatase inhibitor 3		PF3D7_0106000	conserved protein unknown function		PF3D7_1428600	peptide chain release factor 1
PF3D7_1318400	structural maintenance of chromosomes protein 2 putative		PF3D7_1004500	conserved Plasmodium protein unknown function		PF3D7_1335100	merozoite surface protein 7
PF3D7_1436200	conserved Plasmodium protein unknown function		PF3D7_0713800	negative elongation factor A putative		PF3D7_1478100	Plasmodium exported protein (hyp13) unknown function
PF3D7_1324200	micro-fibrillar-associated protein putative		PF3D7_1117700	GTP-binding nuclear protein RAN/TC4		PF3D7_0925300	proline--tRNA ligase putative
PF3D7_1138000	conserved Plasmodium protein unknown function		PF3D7_1121300	tyrosine kinase-like protein		PF3D7_0423500	glideosome associated protein with multiple membrane spans 2
PF3D7_1453200	conserved Plasmodium protein unknown function		PF3D7_0403600	conserved Plasmodium protein unknown function		PF3D7_1422600	conserved Plasmodium protein unknown function
PF3D7_1220300	cell cycle associated protein putative		PF3D7_0821000	conserved Plasmodium protein unknown function		PF3D7_1318000	conserved protein unknown function
PF3D7_1306000	conserved Plasmodium protein unknown function		PF3D7_0305000	elongation factor Ts		PF3D7_1129300	conserved Plasmodium protein unknown function
PF3D7_1312800	conserved Plasmodium protein unknown function		PF3D7_1420200	myosin-specific chaperone UNC putative		PF3D7_0819600	conserved Plasmodium protein unknown function
PF3D7_1339700	conserved Plasmodium protein unknown function		PF3D7_1346900	conserved Plasmodium protein unknown function		PF3D7_0419700	apical merozoite protein
PF3D7_1309400	HORMA domain protein putative		PF3D7_1227600	conserved Plasmodium protein unknown function		PF3D7_1423100	ankyrin-repeat protein putative
PF3D7_1224100	conserved protein unknown function		PF3D7_0106900	2-C-methyl-D-erythritol 4-phosphate cytidylyltransferase putative		PF3D7_1205000	conserved protein unknown function
PF3D7_1019700	conserved Plasmodium protein unknown function		PF3D7_0316200	conserved Plasmodium protein unknown function		PF3D7_0602900	conserved Plasmodium protein unknown function
PF3D7_0720700	phosphoinositide-binding protein putative		PF3D7_1445000	conserved protein unknown function		PF3D7_0802600	adenylyl cyclase beta
PF3D7_0503200	conserved Plasmodium protein unknown function		PF3D7_0910900	DNA primase large subunit putative		PF3D7_0813100	conserved Plasmodium protein unknown function
PF3D7_1306400	26S protease regulatory subunit 10B putative		PF3D7_1104400	thioredoxin-like mero protein		PF3D7_0515700	glideosome-associated protein 40 putative
PF3D7_0318500	conserved Plasmodium protein unknown function		PF3D7_1115000	conserved protein unknown function		PF3D7_0827900	protein disulfide isomerase
PF3D7_1110100	conserved Plasmodium protein unknown function		PF3D7_0807300	ras-related protein Rab-18		PF3D7_0808400	coatomer subunit epsilon putative
PF3D7_1025900	conserved protein unknown function		PF3D7_1017800	conserved Plasmodium protein unknown function		PF3D7_1140400	conserved Plasmodium protein unknown function
PF3D7_0530900	formin 1		PF3D7_0911200	conserved Plasmodium protein unknown function		PF3D7_1449600	conserved protein unknown function
PF3D7_1137200	apical exonemal protein		PF3D7_0306000	conserved protein unknown function		PF3D7_0308700	conserved protein unknown function
PF3D7_1021800	schizont egress antigen-1		PF3D7_1213300	conserved Plasmodium protein unknown function		PF3D7_0105300	cyclase-associated protein
PF3D7_0531100	conserved Plasmodium protein unknown function		PF3D7_0308500	activator of Hsp90 ATPase putative		PF3D7_1038000	antigen UB05
PF3D7_1136200	conserved Plasmodium protein unknown function		PF3D7_1013600	conserved Plasmodium protein unknown function		PF3D7_0930300	merozoite surface protein 1
PF3D7_0622100	conserved Plasmodium protein unknown function		PF3D7_0305900	conserved Plasmodium protein unknown function		PF3D7_0315400	conserved Plasmodium protein unknown function
PF3D7_0827800	SET domain protein putative		PF3D7_0419300	conserved Plasmodium protein unknown function		PF3D7_1338000	LMBR1 domain-containing protein putative
PF3D7_1325400	conserved Plasmodium protein unknown function		PF3D7_0721600	40S ribosomal protein S5 putative		PF3D7_0414900	armadillo-domain containing rhoptry protein
PF3D7_0404700	dipeptidyl aminopeptidase 3		PF3D7_0416800	small GTP-binding protein sar1		PF3D7_0811600	conserved protein unknown function
			PF3D7_0615500	cdc2-related protein kinase 5		PF3D7_1029900	conserved Plasmodium protein unknown function
			PF3D7_1316100	inositol polyphosphate kinase putative		PF3D7_1232500	CG2-related protein putative
			PF3D7_0501500	rhoptry-associated protein 3		PF3D7_0815500	conserved Plasmodium protein unknown function
			PF3D7_1458300	conserved Plasmodium protein unknown function		PF3D7_1313600	conserved protein unknown function
			PF3D7_1010000	ribosomal protein L43 mitochondrial putative		PF3D7_1243500	vacuolar-sorting protein SNF7 putative
			PF3D7_1352300	conserved Plasmodium protein unknown function		PF3D7_0916000	major facilitator superfamily domain-containing protein putative
			PF3D7_0417400	conserved Plasmodium protein unknown function		PF3D7_0628300	choline/ethanolaminephosphotransferase putative
			PF3D7_0613000	conserved Plasmodium protein unknown function		PF3D7_0409500	NAD(P)-binding protein putative
			PF3D7_0414200	calmodulin-like protein		PF3D7_0405900	apical sushi protein
			PF3D7_0918500	telomerase RNA		PF3D7_1226600	proliferating cell nuclear antigen 2
			PF3D7_1351200	conserved Plasmodium protein unknown function
			PF3D7_1132300	nucleic acid binding protein putative
			PF3D7_1105500	centrin-4
			PF3D7_1245200	conserved Plasmodium membrane protein unknown function
			PF3D7_1352400	conserved Plasmodium protein unknown function
			PF3D7_1325900	conserved Plasmodium protein unknown function
			PF3D7_1032400	phosphatidylinositol N-acetylglucosaminyltransferase subunit A putative
			PF3D7_1247000	DNA replication origin binding protein putative
			PF3D7_1332300	trafficking protein particle complex subunit 2 putative
			PF3D7_0105100	conserved Apicomplexan protein unknown function
			PF3D7_0605500	cyclin dependent kinase binding protein putative
			PF3D7_1019400	60S ribosomal protein L30e putative
			PF3D7_1028800	conserved protein unknown function
			PF3D7_0828500	translation initiation factor eIF-2B subunit alpha putative
			PF3D7_1428000	conserved Plasmodium membrane protein unknown function
			PF3D7_0614000	thiamine-phosphate synthase putative
			PF3D7_0417700	conserved Plasmodium protein unknown function
			PF3D7_0207500	serine repeat antigen 6
			PF3D7_0528400	palmitoyltransferase DHHC7
			PF3D7_1457200	thioredoxin 1
			PF3D7_0923500	cyclin-dependent kinases regulatory subunit putative
			PF3D7_1366200	conserved protein unknown function
			PF3D7_0915000	type II NADH:ubiquinone oxidoreductase
			PF3D7_0904500	prefoldin subunit 4 putative
			PF3D7_0511200	stearoyl-CoA desaturase
			PF3D7_0108100	conserved protein unknown function
			PF3D7_1025400	conserved Plasmodium membrane protein unknown function
			PF3D7_0203300	ERCC1 nucleotide excision repair protein putative
			PF3D7_1142400	coproporphyrinogen-III oxidase
			PF3D7_1330400	ER lumen protein retaining receptor 1 putative unspecified product
			PF3D7_1210700	conserved Plasmodium protein unknown function
			PF3D7_1468100	conserved Plasmodium protein unknown function
			PF3D7_0705700	40S ribosomal protein S29 putative
			PF3D7_0615300	GPI-anchored wall transfer protein 1 putative
			PF3D7_1216100	conserved protein unknown function
			PF3D7_0802100	AP2 domain transcription factor putative
			PF3D7_1228500	RNA pseudouridylate synthase putative
			PF3D7_0904900	copper-transporting ATPase
			PF3D7_0825000	conserved Plasmodium protein unknown function
			PF3D7_1121500	conserved protein unknown function
			PF3D7_0811800	conserved Plasmodium protein unknown function
			PF3D7_1014600	transcriptional coactivator ADA2
			PF3D7_1435100	ribonuclease H2 subunit B putative
			PF3D7_0511000	translationally-controlled tumor protein homolog
			PF3D7_1421200	40S ribosomal protein S25
			PF3D7_0614300	major facilitator superfamily-related transporter putative
			PF3D7_1432300	conserved Plasmodium protein unknown function
			PF3D7_0929700	conserved Plasmodium protein unknown function
			PF3D7_0828600	folate transporter 1
			PF3D7_1144700	apicoplast import protein Tic20 putative
			PF3D7_1114700	serine/threonine protein kinase putative
			PF3D7_0516100	cation-transporting ATPase 1
			PF3D7_1343500	conserved protein unknown function
			PF3D7_1119500	AP-4 complex subunit mu putative
			PF3D7_1429600	conserved Plasmodium protein unknown function
			PF3D7_1002900	conserved Plasmodium protein unknown function
			PF3D7_1338900	serine/threonine protein kinase putative
			PF3D7_1346600	conserved protein unknown function
			PF3D7_0713700	conserved Plasmodium protein unknown function
			PF3D7_0603500	cation/H+ antiporter
			PF3D7_0806300	ferlin putative
			PF3D7_1318100	ferredoxin
			PF3D7_0630400	conserved Plasmodium protein unknown function
			PF3D7_1448400	ubiquitin-protein ligase putative
			PF3D7_0705900	ATP synthase subunit C putative
			PF3D7_1216400	conserved Plasmodium membrane protein unknown function
			PF3D7_1210900	GPI mannosyltransferase 1
			PF3D7_0611100	succinate dehydrogenase subunit 3 putative
			PF3D7_0928000	cytochrome c oxidase subunit 6B putative
			PF3D7_0706100	conserved Plasmodium protein unknown function
			PF3D7_1033900	ubiquitin-conjugating enzyme E2 putative
			PF3D7_1330200	conserved Plasmodium protein unknown function
			PF3D7_1025700	conserved protein unknown function
			PF3D7_0721000	conserved Plasmodium membrane protein unknown function
			PF3D7_1323500	plasmepsin V
			PF3D7_0933700	conserved Plasmodium protein unknown function
			PF3D7_0824400	nucleoside transporter 2
			PF3D7_0715800	drug/metabolite transporter DMT1 putative
			PF3D7_0303400	palmitoyltransferase DHHC1
			PF3D7_0307200	60S ribosomal protein L7 putative
			PF3D7_1349700	peptidase putative
			PF3D7_0931000	elongation factor Tu putative
			PF3D7_0824700	lipase maturation factor putative
			PF3D7_1142600	60S ribosomal protein L35ae putative
			PF3D7_1330700	GPI transamidase subunit PIG-U putative
			PF3D7_1458500	spindle assembly abnormal protein 4 putative
			PF3D7_0932800	importin alpha re-exporter putative
			PF3D7_0109900	phosphatidate cytidylyltransferase
			PF3D7_1204300	eukaryotic translation initiation factor 5A
			PF3D7_0816400	EF-hand calcium-binding domain-containing protein putative
			PF3D7_1121900	serine/threonine protein kinase putative
			PF3D7_1450800	conserved protein unknown function
			PF3D7_1363100	conserved Plasmodium protein unknown function
			PF3D7_0413800	50S ribosomal protein L10 putative
			PF3D7_1426000	60S ribosomal protein L21
			PF3D7_1115600	peptidyl-prolyl cis-trans isomerase
			PF3D7_1246800	signal recognition particle receptor subunit beta putative
			PF3D7_0730500	conserved Plasmodium protein unknown function
			PF3D7_1414300	60S ribosomal protein L10 putative
			PF3D7_1127100	deoxyuridine 5'-triphosphate nucleotidohydrolase
			PF3D7_1339900	ABC transporter B family member 5 putative
			PF3D7_1003000	conserved protein unknown function
			PF3D7_0217900	conserved Plasmodium protein unknown function
			PF3D7_0809600	peptidase family C50 putative
			PF3D7_0503400	actin-depolymerizing factor 1
			PF3D7_1465900	40S ribosomal protein S3
			PF3D7_0816100	phosphopantothenoylcysteine decarboxylase putative
			PF3D7_1322600	conserved Plasmodium protein unknown function

## Sheet: Downreg_Overlap
CQ 3D7 MK 3D7 MK Dd2 (n=22)			CQ 3D7 MFQ 3D7 MK 3D7 (n=2)			MFQ 3D7 MK 3D7 MK Dd2 (n=6)			CQ 3D7 MK 3D7 (n=19)			CQ 3D7 MK Dd2 (n=10)			MK 3D7 MK Dd2 (n=51)			MFQ 3D7 MK 3D7 (n=22)			MFQ 3D7 MK Dd2 (n=2)
Gene Id	Product		Gene Id	Product		Gene Id	Product		Gene Id	Product		Gene Id	Product		Gene Id	Product		Gene Id	Product		Gene Id	Product
PF3D7_0613800	AP2 domain transcription factor putative		PF3D7_0530300	conserved Plasmodium membrane protein unknown function		PF3D7_0614900	conserved Plasmodium membrane protein unknown function		PF3D7_1448500	conserved Plasmodium protein unknown function		PF3D7_1243900	double C2-like domain-containing protein		PF3D7_0207700	serine repeat antigen 4		PF3D7_0707200	conserved Plasmodium protein unknown function		PF3D7_1020900	ADP-ribosylation factor
PF3D7_0507200	subtilisin-like protease 3		PF3D7_0903300	conserved protein unknown function		PF3D7_1143200	DnaJ protein putative		PF3D7_0704100	conserved Plasmodium membrane protein unknown function		PF3D7_0722200	rhoptry-associated leucine zipper-like protein 1		PF3D7_1141800	EELM2 domain-containing protein putative		PF3D7_0728100	conserved Plasmodium membrane protein unknown function		PF3D7_0817900	high mobility group protein B2
PF3D7_1252100	rhoptry neck protein 3					PF3D7_1321500	3'5'-cyclic nucleotide phosphodiesterase putative		PF3D7_1028900	inner membrane complex protein 1m putative		PF3D7_0508900	conserved Plasmodium protein unknown function		PF3D7_0704500	serine/threonine protein kinase putative		PF3D7_0305700	ubiquitin-conjugating enzyme E2 putative
PF3D7_1228600	merozoite surface protein 9					PF3D7_1234600	protein TOC75 putative		PF3D7_0930800	conserved Plasmodium membrane protein unknown function		PF3D7_1440400	zinc finger protein putative		PF3D7_1227500	protein SOC2 putative		PF3D7_0323000	translation machinery-associated protein 7 putative
PF3D7_1128900	conserved protein unknown function					PF3D7_0907800	ribosomal protein L35 apicoplast putative		PF3D7_0416500	repressor of RNA polymerase III transcription MAF1		PF3D7_0407800	conserved Plasmodium protein unknown function		PF3D7_1315300	conserved protein unknown function		PF3D7_1143500	conserved Plasmodium protein unknown function
PF3D7_0905400	high molecular weight rhoptry protein 3					PF3D7_0723800	conserved Plasmodium protein unknown function		PF3D7_1433400	zinc finger protein putative		PF3D7_0214900	rhoptry neck protein 6		PF3D7_1332200	conserved protein unknown function		PF3D7_0726400	conserved Plasmodium membrane protein unknown function
PF3D7_0310400	parasite-infected erythrocyte surface protein								PF3D7_1322200	conserved Plasmodium protein unknown function		PF3D7_0628100	HECT-domain (ubiquitin-transferase) putative		PF3D7_0719500	LEM3/CDC50 family protein putative		PF3D7_1433800	conserved Plasmodium protein unknown function
PF3D7_0604100	AP2 domain transcription factor								PF3D7_1035200	S-antigen		PF3D7_1018200	serine/threonine protein phosphatase 8 putative		PF3D7_0918000	glideosome-associated protein 50		PF3D7_1425800	conserved Plasmodium protein unknown function
PF3D7_0611600	basal complex transmembrane protein 1								PF3D7_1113800	conserved Plasmodium membrane protein unknown function		PF3D7_1131100	serpentine receptor putative		PF3D7_1410400	rhoptry-associated protein 1		PF3D7_1134100	protein disulfide isomerase
PF3D7_1307900	tripartite motif protein putative								PF3D7_1457400	conserved Plasmodium protein unknown function		PF3D7_0423300	conserved Plasmodium protein unknown function		PF3D7_1327400	conserved Plasmodium protein unknown function		PF3D7_0307600	conserved Plasmodium protein unknown function
PF3D7_0508100	SET domain protein putative								PF3D7_1012200	rhoptry associated adhesin					PF3D7_0511800	inositol-3-phosphate synthase		PF3D7_0710000	conserved Plasmodium protein unknown function
PF3D7_1035100	probable protein unknown function								PF3D7_0804500	conserved Plasmodium membrane protein unknown function					PF3D7_1340800	mitochondrial pyruvate carrier protein 1 putative		PF3D7_0513800	ras-related protein Rab-1A
PF3D7_0204100	Sel1 repeat-containing protein putative								PF3D7_0705100	conserved Plasmodium protein unknown function					PF3D7_0826400	dehydrodolichyl diphosphate synthetase putative		PF3D7_1437500	conserved Plasmodium membrane protein unknown function
PF3D7_0607700	conserved Plasmodium protein unknown function								PF3D7_1308400	conserved Plasmodium protein unknown function					PF3D7_0522600	inner membrane complex protein		PF3D7_1019500	conserved Plasmodium membrane protein unknown function
PF3D7_1452000	rhoptry neck protein 2								PF3D7_0504800	conserved Plasmodium protein unknown function					PF3D7_0716300	conserved protein unknown function		PF3D7_0111300	P-loop containing nucleoside triphosphate hydrolase putative
PF3D7_1019100	conserved Plasmodium protein unknown function								PF3D7_0719900	conserved Plasmodium membrane protein unknown function					PF3D7_0302500	cytoadherence linked asexual protein 3.1		PF3D7_1202900	high mobility group protein B1
PF3D7_1145200	serine/threonine protein kinase putative								PF3D7_0419400	conserved Plasmodium protein unknown function					PF3D7_0914400	conserved protein unknown function		PF3D7_0419900	phosphatidylinositol 4-kinase putative
PF3D7_0919900	regulator of chromosome condensation-PP1-interacting protein								PF3D7_0308100	zinc finger protein putative					PF3D7_1364100	6-cysteine protein		PF3D7_0322700	conserved Plasmodium protein unknown function
PF3D7_0612200	leucine-rich repeat protein								PF3D7_1408700	conserved protein unknown function					PF3D7_0802800	serine/threonine protein phosphatase 2B catalytic subunit A		PF3D7_1131300	conserved Plasmodium protein unknown function
PF3D7_1229300	conserved Plasmodium protein unknown function														PF3D7_0618900	phosphatidylinositol N-acetylglucosaminyltransferase subunit GPI1		PF3D7_1203400	major facilitator superfamily domain-containing protein putative
PF3D7_0905500	conserved protein unknown function														PF3D7_0322300	diacylglycerol O-acyltransferase		PF3D7_1325600	mitochondrial fission 1 protein putative
PF3D7_1133300	LEM3/CDC50 family protein putative														PF3D7_0217500	calcium-dependent protein kinase 1		PF3D7_0806200	Dpy-19-like C-mannosyltransferase putative
															PF3D7_1361800	glideosome-associated connector
															PF3D7_0817700	rhoptry neck protein 5
															PF3D7_0404900	6-cysteine protein
															PF3D7_1457900	conserved Plasmodium protein unknown function
															PF3D7_0314900	conserved Plasmodium membrane protein unknown function
															PF3D7_1437300	conserved Plasmodium protein unknown function
															PF3D7_1348600	conserved Plasmodium protein unknown function
															PF3D7_0207600	serine repeat antigen 5
															PF3D7_1421900	copper transporter putative
															PF3D7_1143000	alpha/beta hydrolase putative
															PF3D7_1007200	rho GTPase-activating protein putative
															PF3D7_0322000	peptidyl-prolyl cis-trans isomerase
															PF3D7_0307400	ATP-dependent Clp protease proteolytic subunit
															PF3D7_1422500	ERAD-associated E3 ubiquitin-protein ligase HRD1
															PF3D7_1322500	palmitoyltransferase DHHC5
															PF3D7_1331600	protein tyrosine phosphatase-like protein putative
															PF3D7_0831600	cytoadherence linked asexual protein 8
															PF3D7_1245500	conserved Plasmodium protein unknown function
															PF3D7_0929400	high molecular weight rhoptry protein 2
															PF3D7_1409400	conserved protein unknown function
															PF3D7_0501600	rhoptry-associated protein 2
															PF3D7_0526200	ADP-ribosylation factor GTPase-activating protein putative
															PF3D7_1334600	MSP7-like protein
															PF3D7_1223100	cAMP-dependent protein kinase regulatory subunit
															PF3D7_1135900	3-oxo-5-alpha-steroid 4-dehydrogenase putative
															PF3D7_0935800	cytoadherence linked asexual protein 9
															PF3D7_0321400	protein kinase putative
															PF3D7_1358700	YOP1-like protein putative
															PF3D7_0707300	rhoptry-associated membrane antigen
